# Supplementary material for: Reprogramming of glutamine metabolism via glutamine synthetase silencing induces cisplatin resistance in A2780 ovarian cancer cells
Source: PubMed Central journal article supplement (PMC7891143; doi:10.1186/s12885-021-07879-5), 2021-02-17
Supplement: 12885_2021_7879_MOESM1_ESM.pdf [file 12885_2021_7879_MOESM1_ESM.pdf]

Supplementary Files for  
Reprogramming of glutamine metabolism via glutamine synthetase  
silencing induces cisplatin resistance in A2780 ovarian cancer cells

Jing Guo, Kiyotoshi Satoh\*, Sho Tabata, Masaru Mori, Masaru Tomita, and  
Tomoyoshi Soga

\*Correspondence to Kiyotoshi Satoh, E-mail: [ksatoh@ttck.keio.ac.jp](mailto:ksatoh@ttck.keio.ac.jp)

This file includes:  
4 Figures and 6 Tables

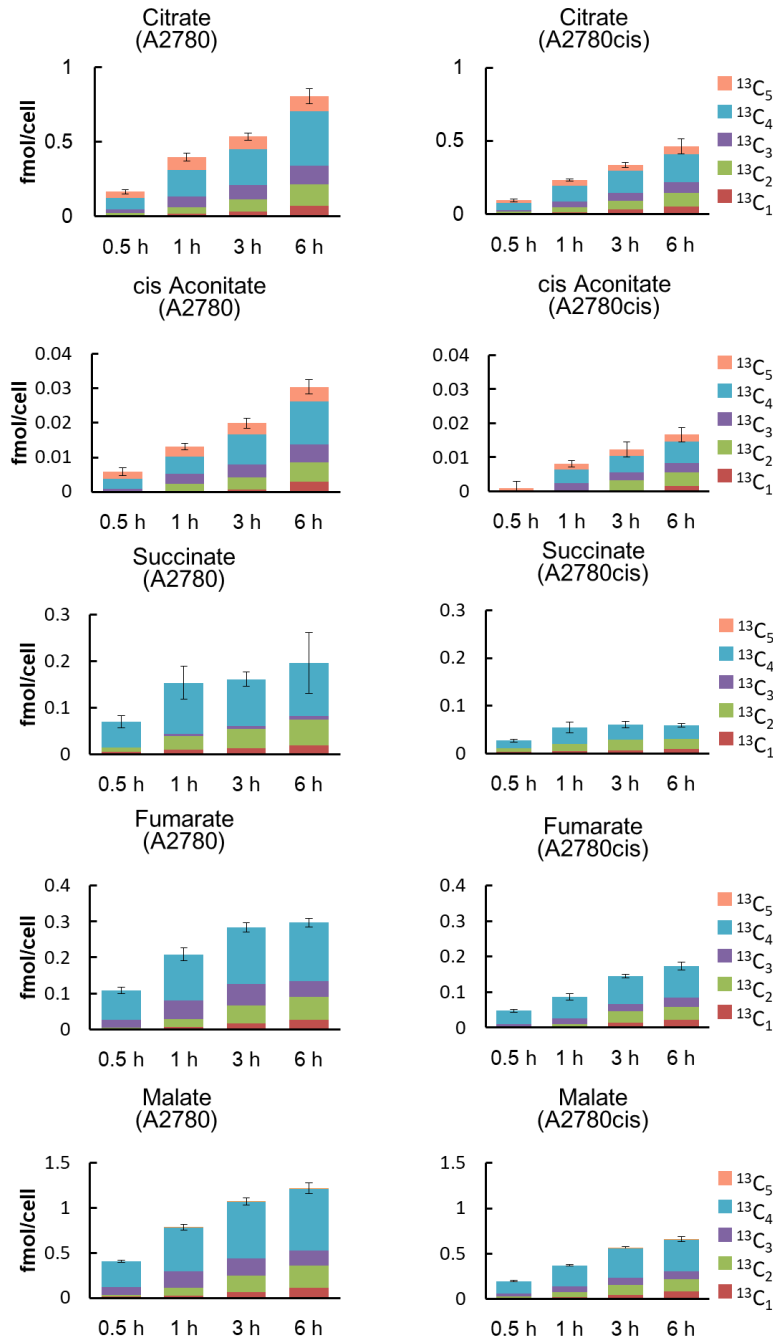

**Figure S1. Metabolic flux analysis using isotopically labelled glutamine in A2780 and A2780cis cells.**

Isotopologue distribution of metabolites in A2780 and A2780cis cells. Cells were incubated with medium containing glutamine isotopically labeled at all five carbon atoms ( $^{13}\text{C}_5$ -glutamine) for the indicated time periods. Carbon fluxes from glutamine to TCA cycle metabolites were determined using CE-TOFMS. Each bar color corresponds to the number of  $^{13}\text{C}$  replaced with  $^{12}\text{C}$  in the metabolites. Data are shown as the mean  $\pm$  SD of the three independent experiments. See also Figure 2.

**Table S1. Primer sequences used for RT-PCR analysis.**

---

|                |                                         |
|----------------|-----------------------------------------|
| GS             | Forward : 5' AGGGTTAAAGAGGGCAACCC 3'    |
|                | Reverse : 5' GAGGTGGTCATGGTGGAAAGG 3'   |
| GLUD1          | Forward : 5' GGGAGGTCATCGAAGGCTAC 3'    |
|                | Reverse : 5' TCACATCAGTGCTGTAACGGA 3'   |
| GCLC           | Forward : 5' GTTCTCAAGTGGGGCGATGA 3'    |
|                | Reverse : 5' TTCTCCCCAGACAGGACCAA 3'    |
| GSS            | Forward : 5' GAACCGTTCGCGGAGGAAA 3'     |
|                | Reverse : 5' TATCCTGCAAGAGGCTCCCC 3'    |
| GSTP1          | Forward : 5' GAGGACCTCCGCTGCAAATA 3'    |
|                | Reverse: 5' CAGCAGGGTCTCAAAGGCT 3'      |
| $\beta$ -actin | Forward : 5' CCAGCCTTCCTTCCTGGGCATGG 3' |
|                | Reverse : 5' TTGGCGTACAGGTCTTTGCGGAT 3' |
| GLS            | Forward : 5' TAGCTTGGAAGATTTGCTGT 3'    |
|                | Reverse : 5' CCTGTAGATTTGAGTGCTGT 3'    |
| RPL27          | Forward : 5' CTGTCGTCAATAAGGATGTCT 3'   |
|                | Reverse : 5' CTTGTTCTTGCCTGTCTTGT 3'    |

---

**Table S2. Metabolites with significant differences in expression between A2780 and A2780cis cells**

The levels of 189 metabolites in A2780 and A2780cis cells in the presence of glutamine were determined via CE-TOFMS using 513 metabolite standards. The levels of 50 metabolites in A2780cis cells were at least 2.0-fold higher than those in A2780 cells, whereas those of 8 metabolites were lower by 0.5-fold or less than those in A2780 cells (n=3). Statistical significance was determined using the Students' *t* test ( $p < 0.05$ ). See also Figure 1C.

|                            | Fold<br>(A2780cis/A2780) | Average<br>(fmol/cell)<br>(A2780) | Average<br>(fmol/cell)<br>(A2780cis) | p value  |    |
|----------------------------|--------------------------|-----------------------------------|--------------------------------------|----------|----|
| Gln                        | 88.62                    | 0.026                             | 2.317                                | 7.20E-04 | Up |
| Glycerophosphorylcholine   | 13.82                    | 0.208                             | 2.871                                | 1.41E-04 | Up |
| Urea                       | 8.92                     | 0.447                             | 3.993                                | 8.41E-04 | Up |
| Asp                        | 8.12                     | 0.145                             | 1.179                                | 2.08E-06 | Up |
| o-Acetylcarnitine          | 5.69                     | 0.233                             | 1.328                                | 4.56E-05 | Up |
| Carnitine                  | 5.52                     | 0.007                             | 0.038                                | 1.52E-06 | Up |
| Choline                    | 5.31                     | 0.010                             | 0.055                                | 2.62E-03 | Up |
| Glycerophosphate           | 5.12                     | 0.126                             | 0.644                                | 1.34E-03 | Up |
| Ala                        | 4.91                     | 1.384                             | 6.794                                | 1.56E-03 | Up |
| 4-Oxopentanoate            | 4.83                     | 0.037                             | 0.180                                | 2.06E-02 | Up |
| GABA                       | 4.69                     | 0.044                             | 0.206                                | 3.01E-03 | Up |
| Hypotaurine                | 4.54                     | 0.142                             | 0.647                                | 2.68E-06 | Up |
| beta-Ala                   | 4.36                     | 0.107                             | 0.467                                | 3.86E-04 | Up |
| Taurine                    | 4.31                     | 0.391                             | 1.686                                | 4.26E-03 | Up |
| Kynurenine                 | 4.27                     | 0.007                             | 0.030                                | 1.83E-03 | Up |
| Ophthalmate                | 4.05                     | 0.001                             | 0.003                                | 3.59E-02 | Up |
| Creatinine                 | 3.94                     | 0.016                             | 0.064                                | 1.14E-02 | Up |
| GIP                        | 3.75                     | 0.032                             | 0.120                                | 2.79E-03 | Up |
| alpha-Aminoadipate         | 3.68                     | 0.005                             | 0.019                                | 4.43E-04 | Up |
| 3-Hydroxybutyrate          | 3.61                     | 0.049                             | 0.177                                | 2.25E-03 | Up |
| Glu                        | 3.37                     | 2.953                             | 9.962                                | 6.15E-05 | Up |
| Glycolate                  | 3.31                     | 0.070                             | 0.233                                | 4.41E-02 | Up |
| Glutathione (GSH)          | 3.11                     | 1.179                             | 3.667                                | 6.97E-05 | Up |
| gamma-Butyrobetaine        | 3.09                     | 0.009                             | 0.027                                | 2.55E-04 | Up |
| threo-beta-methylaspartate | 2.95                     | 8.221                             | 24.259                               | 3.54E-04 | Up |
| GDP                        | 2.90                     | 0.004                             | 0.012                                | 2.07E-02 | Up |
| Val                        | 2.89                     | 0.117                             | 0.339                                | 3.22E-03 | Up |
| trans-Cinnamate            | 2.87                     | 0.227                             | 0.650                                | 4.83E-03 | Up |
| Azelate                    | 2.84                     | 0.009                             | 0.026                                | 1.81E-03 | Up |
| Cysteine sulfinate         | 2.82                     | 0.036                             | 0.103                                | 5.86E-03 | Up |
| 2-Hydroxybutyrate          | 2.77                     | 0.016                             | 0.045                                | 6.85E-03 | Up |
| Met                        | 2.60                     | 0.079                             | 0.206                                | 1.62E-06 | Up |
| Pro                        | 2.57                     | 1.060                             | 2.721                                | 6.38E-05 | Up |

|                                    |      |        |        |          |      |
|------------------------------------|------|--------|--------|----------|------|
| Nicotinamide                       | 2.56 | 0.011  | 0.028  | 2.87E-04 | Up   |
| Ornithine                          | 2.45 | 0.117  | 0.286  | 2.26E-03 | Up   |
| Carnosine                          | 2.42 | 0.002  | 0.006  | 2.04E-02 | Up   |
| Carbamoyl phosphate                | 2.41 | 0.453  | 1.091  | 1.29E-03 | Up   |
| N-gamma-ethylglutamine             | 2.37 | 0.003  | 0.006  | 4.51E-04 | Up   |
| Thiamine                           | 2.36 | 0.003  | 0.007  | 8.29E-03 | Up   |
| Betaine                            | 2.35 | 0.045  | 0.105  | 1.53E-04 | Up   |
| CDP                                | 2.29 | 0.006  | 0.013  | 2.46E-02 | Up   |
| Creatine                           | 2.23 | 1.055  | 2.347  | 5.70E-04 | Up   |
| Leu                                | 2.22 | 0.415  | 0.922  | 5.58E-05 | Up   |
| Syringate                          | 2.20 | 0.077  | 0.169  | 1.13E-02 | Up   |
| Phe                                | 2.13 | 0.094  | 0.201  | 3.49E-05 | Up   |
| 2AB                                | 2.11 | 0.021  | 0.045  | 4.23E-03 | Up   |
| Thr                                | 2.06 | 0.484  | 0.996  | 8.89E-05 | Up   |
| NADP+                              | 2.05 | 0.005  | 0.010  | 3.13E-02 | Up   |
| ADP                                | 2.03 | 0.131  | 0.266  | 4.07E-05 | Up   |
| Lactate                            | 2.01 | 11.655 | 23.389 | 2.92E-04 | Up   |
| N-Acetylputrescine                 | 0.48 | 0.025  | 0.012  | 7.41E-03 | Down |
| SAM+                               | 0.43 | 0.038  | 0.016  | 1.90E-03 | Down |
| N-Acetylglucosamine<br>6-phosphate | 0.37 | 0.113  | 0.042  | 1.37E-02 | Down |
| Argininosuccinate                  | 0.34 | 0.043  | 0.015  | 1.36E-05 | Down |
| Arg                                | 0.28 | 0.819  | 0.231  | 7.33E-03 | Down |
| Ser                                | 0.22 | 0.675  | 0.151  | 2.91E-04 | Down |
| Cystathionine                      | 0.10 | 0.558  | 0.057  | 4.90E-05 | Down |
| 2-Hydroxyglutarate                 | 0.05 | 0.127  | 0.007  | 1.09E-04 | Down |

**Table S3. Metabolites with significant differences in expression between A2780 and A2780cis cells in the presence of glutamine**

The levels of 77 metabolites in A2780 and A2780cis cells were determined via CE-TOFMS using 114 metabolite standards. The levels of 28 metabolites in A2780cis cells were at least 1.5-fold higher than those in A2780 cells, whereas those of 7 metabolites were lower by 0.67-fold or less than those in A2780 cells (n=3). Statistical significance was determined by Students' *t* test (p<0.05). See also Figure 3A.

|                    | Fold<br>(A2780cis/A2780) | Average<br>(fmol/cell)<br>(A2780) | Average<br>(fmol/cell)<br>(A2780cis) | p value  |      |
|--------------------|--------------------------|-----------------------------------|--------------------------------------|----------|------|
| Gln                | 31.67                    | 0.139                             | 4.400                                | 5.26E-04 | Up   |
| Val                | 29.52                    | 0.017                             | 0.512                                | 3.07E-05 | Up   |
| Ala                | 13.51                    | 0.944                             | 12.753                               | 2.53E-04 | Up   |
| Asp                | 11.90                    | 0.157                             | 1.865                                | 4.86E-04 | Up   |
| Met                | 11.67                    | 0.028                             | 0.322                                | 4.94E-03 | Up   |
| Phe                | 10.40                    | 0.029                             | 0.303                                | 1.84E-04 | Up   |
| F1,6P              | 10.23                    | 0.052                             | 0.530                                | 1.33E-03 | Up   |
| Glutathione (GSH)  | 9.97                     | 0.885                             | 8.816                                | 1.52E-04 | Up   |
| Lys                | 9.17                     | 0.019                             | 0.171                                | 3.45E-03 | Up   |
| G6P                | 6.71                     | 0.018                             | 0.123                                | 3.94E-03 | Up   |
| F6P                | 5.34                     | 0.006                             | 0.034                                | 2.74E-02 | Up   |
| Glu                | 3.58                     | 6.191                             | 22.182                               | 4.55E-05 | Up   |
| GABA               | 3.56                     | 0.123                             | 0.439                                | 1.38E-05 | Up   |
| G1P                | 3.50                     | 0.068                             | 0.236                                | 2.83E-03 | Up   |
| Cysteine sulfinate | 3.28                     | 0.041                             | 0.135                                | 2.86E-03 | Up   |
| Thr                | 2.97                     | 0.535                             | 1.589                                | 7.54E-06 | Up   |
| CoA                | 2.85                     | 0.005                             | 0.015                                | 1.83E-02 | Up   |
| Hypotaurine        | 2.56                     | 0.666                             | 1.705                                | 6.26E-06 | Up   |
| Fumarate           | 2.55                     | 0.073                             | 0.185                                | 9.49E-03 | Up   |
| ATP                | 2.32                     | 1.826                             | 4.240                                | 4.88E-02 | Up   |
| Malate             | 2.30                     | 0.307                             | 0.707                                | 5.18E-03 | Up   |
| DHAP               | 2.26                     | 0.017                             | 0.039                                | 1.61E-02 | Up   |
| Pyruvate           | 2.18                     | 0.346                             | 0.755                                | 5.88E-03 | Up   |
| Leu                | 2.12                     | 0.731                             | 1.546                                | 3.49E-04 | Up   |
| Glycerophosphate   | 1.77                     | 0.546                             | 0.968                                | 2.21E-02 | Up   |
| Taurine            | 1.67                     | 0.440                             | 0.737                                | 4.37E-03 | Up   |
| Ile                | 1.66                     | 0.985                             | 1.632                                | 2.46E-05 | Up   |
| PEP                | 1.55                     | 0.021                             | 0.033                                | 1.40E-02 | Up   |
| Gly                | 0.58                     | 17.570                            | 10.164                               | 2.18E-04 | Down |
| Citrulline         | 0.55                     | 0.127                             | 0.070                                | 2.44E-03 | Down |
| Lactate            | 0.55                     | 26.650                            | 14.583                               | 3.68E-04 | Down |
| Ser                | 0.36                     | 0.666                             | 0.240                                | 2.70E-04 | Down |
| Cystathionine      | 0.24                     | 0.606                             | 0.145                                | 3.38E-04 | Down |
| Arg                | 0.20                     | 4.333                             | 0.882                                | 1.65E-03 | Down |
| 2-Hydroxyglutarate | 0.17                     | 0.156                             | 0.026                                | 4.85E-02 | Down |

**Table S4. Metabolites with significant differences in expression between A2780 and A2780cis cells under glutamine starvation**

The levels of 63 metabolites in A2780 and A2780cis cells in the absence of glutamine were determined via CE-TOFMS using 114 metabolite standards. The levels of 10 metabolites in A2780cis cells were at least 1.5-fold higher than those in A2780 cells, whereas those of 8 metabolites were lower by 0.67-fold or less than those in A2780 cells (n=3). Statistical significance was determined by the Students' *t* test ( $p < 0.05$ ). See also Figure 3A.

|                    | Fold<br>(A2780cis/A2780) | Average<br>(fmol/cell)<br>(A2780) | Average<br>(fmol/cell)<br>(A2780cis) | p value  |      |
|--------------------|--------------------------|-----------------------------------|--------------------------------------|----------|------|
| Hypotaurine        | 9.78                     | 0.220                             | 2.151                                | 1.38E-06 | Up   |
| Ala                | 7.93                     | 0.417                             | 3.306                                | 3.64E-05 | Up   |
| Glutathione (GSH)  | 5.31                     | 0.866                             | 4.602                                | 1.27E-02 | Up   |
| Creatine           | 4.98                     | 4.520                             | 22.521                               | 3.13E-05 | Up   |
| Taurine            | 4.57                     | 0.336                             | 1.535                                | 2.26E-03 | Up   |
| GABA               | 2.7                      | 0.156                             | 0.423                                | 2.07E-04 | Up   |
| beta-Ala           | 2.58                     | 0.200                             | 0.517                                | 2.61E-04 | Up   |
| Glycerophosphate   | 2.37                     | 0.885                             | 2.096                                | 2.46E-02 | Up   |
| Glu                | 1.93                     | 4.570                             | 8.814                                | 1.20E-02 | Up   |
| CDP                | 1.64                     | 0.032                             | 0.052                                | 3.13E-02 | Up   |
| Citrulline         | 0.63                     | 0.119                             | 0.076                                | 2.42E-02 | Down |
| Gly                | 0.57                     | 50.721                            | 29.114                               | 3.76E-02 | Down |
| Tyr                | 0.55                     | 1.677                             | 0.928                                | 4.62E-02 | Down |
| S7P                | 0.34                     | 0.164                             | 0.056                                | 2.74E-03 | Down |
| Cystathionine      | 0.3                      | 0.351                             | 0.104                                | 2.15E-02 | Down |
| 3PG                | 0.3                      | 0.181                             | 0.054                                | 8.60E-03 | Down |
| 2-Hydroxyglutarate | 0.27                     | 0.211                             | 0.058                                | 3.67E-02 | Down |
| Trp                | 0.23                     | 0.362                             | 0.083                                | 1.73E-02 | Down |

**Table S5. Metabolites significantly changed under glutamine starvation in A2780 cells**

The levels of 70 metabolites in A2780 cells in the presence (Gln+) or absence (Gln-) of glutamine were determined via CE-TOFMS using 114 metabolite standards. The levels of 27 metabolites in the absence of glutamine were at least 1.5-fold higher than those in the presence of glutamine, whereas those of 5 metabolites were lower by 0.67-fold or less than those in the presence of glutamine (n=3). Statistical significance was determined using the Students' *t* test ( $p < 0.05$ ). See also Figure 3A.

|               | Fold<br>(Gln-/Gln+) | Average<br>(fmol/cell)<br>(Gln+) | Average<br>(fmol/cell)<br>(Gln-) | p value  |      |
|---------------|---------------------|----------------------------------|----------------------------------|----------|------|
| Val           | 102.13              | 0.017                            | 1.773                            | 2.41E-02 | Up   |
| Lys           | 91.96               | 0.019                            | 1.719                            | 3.40E-02 | Up   |
| F1,6P         | 46.24               | 0.052                            | 2.397                            | 9.80E-03 | Up   |
| Phe           | 45.25               | 0.029                            | 1.318                            | 1.94E-02 | Up   |
| Met           | 38.60               | 0.028                            | 1.064                            | 1.77E-02 | Up   |
| DHAP          | 24.45               | 0.017                            | 0.424                            | 3.85E-02 | Up   |
| Ru5P          | 13.78               | 0.010                            | 0.138                            | 2.27E-02 | Up   |
| IMP           | 11.29               | 0.009                            | 0.101                            | 1.15E-02 | Up   |
| Thr           | 10.81               | 0.535                            | 5.781                            | 1.29E-02 | Up   |
| GTP           | 9.81                | 0.212                            | 2.079                            | 2.34E-02 | Up   |
| S7P           | 8.29                | 0.020                            | 0.164                            | 5.83E-03 | Up   |
| G1P           | 6.68                | 0.068                            | 0.452                            | 1.01E-03 | Up   |
| G6P           | 6.34                | 0.018                            | 0.117                            | 8.14E-04 | Up   |
| Ser           | 5.14                | 0.666                            | 3.422                            | 1.09E-02 | Up   |
| Leu           | 4.66                | 0.731                            | 3.403                            | 2.96E-02 | Up   |
| GDP           | 4.35                | 0.024                            | 0.103                            | 1.50E-02 | Up   |
| Carnosine     | 4.13                | 0.004                            | 0.016                            | 2.81E-02 | Up   |
| 2PG           | 3.51                | 0.008                            | 0.029                            | 1.37E-03 | Up   |
| Tyr           | 3.31                | 0.507                            | 1.677                            | 2.25E-02 | Up   |
| 3PG           | 3.13                | 0.058                            | 0.181                            | 2.00E-02 | Up   |
| PEP           | 2.89                | 0.021                            | 0.062                            | 1.77E-04 | Up   |
| Gly           | 2.89                | 17.570                           | 50.721                           | 1.75E-02 | Up   |
| dTTP          | 2.70                | 0.018                            | 0.047                            | 7.76E-03 | Up   |
| SAM+          | 2.28                | 0.019                            | 0.044                            | 1.05E-03 | Up   |
| ADP           | 2.27                | 0.257                            | 0.585                            | 3.77E-02 | Up   |
| AMP           | 2.23                | 0.053                            | 0.119                            | 9.58E-05 | Up   |
| Asn           | 2.21                | 6.985                            | 15.414                           | 2.96E-02 | Up   |
| Cystathionine | 0.58                | 0.606                            | 0.351                            | 2.48E-02 | Down |
| Taurine       | 0.56                | 0.440                            | 0.247                            | 3.13E-03 | Down |
| Ala           | 0.44                | 0.944                            | 0.417                            | 2.36E-02 | Down |
| Hypotaurine   | 0.33                | 0.666                            | 0.220                            | 2.36E-04 | Down |
| beta-Ala      | 0.28                | 0.716                            | 0.200                            | 1.18E-04 | Down |



**Table S6. Metabolites significantly changed under glutamine starvation in A2780cis cells**

The levels of 63 metabolites in A2780cis cells in the presence (Gln+) or absence (Gln-) of glutamine were determined via CE-TOFMS using 114 metabolite standards. The levels of 23 metabolites in the absence of glutamine were at least 1.5-fold higher than those in the presence of glutamine, whereas those of 9 metabolites were lower by 0.67-fold or less than those in the presence of glutamine (n=3). Statistical significance was determined using the Students' *t* test ( $p < 0.05$ ). See also Figure 3A.

|                    | Fold<br>(Gln-/Gln+) | Average<br>(fmol/cell)<br>(Gln+) | Average<br>(fmol/cell)<br>(Gln-) | p value  |      |
|--------------------|---------------------|----------------------------------|----------------------------------|----------|------|
| Ser                | 17.25               | 0.240                            | 4.138                            | 7.52E-04 | Up   |
| Creatine           | 5.32                | 4.233                            | 22.521                           | 8.09E-04 | Up   |
| Lys                | 3.87                | 0.171                            | 0.663                            | 1.08E-02 | Up   |
| F1,6P              | 3.81                | 0.530                            | 2.021                            | 1.96E-05 | Up   |
| CDP                | 3.01                | 0.017                            | 0.052                            | 1.67E-02 | Up   |
| Gly                | 2.86                | 10.164                           | 29.114                           | 9.24E-04 | Up   |
| Arg                | 2.65                | 0.882                            | 2.336                            | 6.13E-03 | Up   |
| GDP                | 2.64                | 0.051                            | 0.135                            | 2.48E-03 | Up   |
| Thr                | 2.58                | 1.589                            | 4.103                            | 5.16E-04 | Up   |
| Phe                | 2.33                | 0.303                            | 0.705                            | 1.00E-02 | Up   |
| AMP                | 2.30                | 0.057                            | 0.130                            | 9.65E-05 | Up   |
| Glycerophosphate   | 2.16                | 0.968                            | 2.096                            | 3.10E-02 | Up   |
| Val                | 2.15                | 0.512                            | 1.103                            | 8.71E-03 | Up   |
| Taurine            | 2.08                | 0.737                            | 1.535                            | 2.15E-02 | Up   |
| 2-Hydroxyglutarate | 2.05                | 0.026                            | 0.054                            | 9.45E-03 | Up   |
| ADP                | 2.02                | 0.366                            | 0.741                            | 5.52E-05 | Up   |
| Met                | 1.95                | 0.322                            | 0.629                            | 7.68E-04 | Up   |
| SAM+               | 1.74                | 0.024                            | 0.043                            | 1.04E-03 | Up   |
| Tyr                | 1.73                | 0.537                            | 0.928                            | 7.36E-03 | Up   |
| Glutathione (GSSG) | 1.66                | 1.217                            | 2.024                            | 1.47E-02 | Up   |
| Asn                | 1.57                | 6.229                            | 9.782                            | 3.35E-03 | Up   |
| CTP                | 1.57                | 0.296                            | 0.465                            | 1.92E-02 | Up   |
| GIP                | 1.56                | 0.236                            | 0.369                            | 8.60E-03 | Up   |
| Citrate            | 0.66                | 1.035                            | 0.680                            | 3.87E-02 | Down |
| beta-Ala           | 0.53                | 0.981                            | 0.517                            | 6.24E-05 | Down |
| Glutathione (GSH)  | 0.52                | 8.816                            | 4.602                            | 2.21E-03 | Down |
| cis-Aconitate      | 0.51                | 0.051                            | 0.026                            | 2.43E-02 | Down |
| Fumarate           | 0.43                | 0.185                            | 0.079                            | 1.16E-02 | Down |
| Malate             | 0.41                | 0.707                            | 0.292                            | 2.25E-04 | Down |
| Glu                | 0.40                | 22.182                           | 8.814                            | 2.17E-04 | Down |
| Asp                | 0.27                | 1.865                            | 0.495                            | 2.10E-05 | Down |
| Ala                | 0.26                | 12.753                           | 3.306                            | 9.46E-05 | Down |
